# Supplementary material
Source: PubMed Central journal article supplement (PMC3600846)

**Supplementary Table 1A: UCSF and Mayo Clinic Cases and Controls used in the Study Stages.**

|                                                                       |                                   | UCSF | Mayo   |
|-----------------------------------------------------------------------|-----------------------------------|------|--------|
| Stage 1A: Imputation*                                                 | Oligodendroglioma/MOA** Cases     | 191  | 199    |
|                                                                       | Controls                          | 192  | 532    |
| Stage 1B: Long Range PCR / Pooled Next Generation Sequencing          | Oligodendroglioma/MOA Cases       | 177  | 220    |
|                                                                       | Controls                          | 547  | 274    |
| Stage 2: Custom validation genotyping for 8q24.21 (CCDC26) Region**** | Oligodendroglioma Cases           | 168  | 98     |
|                                                                       | MOA Cases                         | 59   | 166    |
|                                                                       | Astrocytoma (A2) Cases            | 84   | 65     |
|                                                                       | Anaplastic Astrocytoma (A3) Cases | 104  | 188    |
|                                                                       | Glioblastoma (A4) Cases           | 390  | 330    |
|                                                                       | All Gliomas                       | 805  | 852*** |
|                                                                       | Controls                          | 512  | 789    |

\* Imputation was performed using the data published in Jenkins et al. Cancer Genetics 1:13;2011

\*\* MOA = mixed oligoastrocytoma

\*\*\* Five Mayo astrocytomas were of indeterminant grade

\*\*\*\* For UCSF, 182 of the cases and none of the controls in Stage 2 were also used for Stages 1A and 1B. For Mayo, 693 of the cases and 578 controls were also used in stages 1A and 1B.

**Supplementary Table 1B: Age and Gender of UCSF and Mayo Clinic Cases and Controls used in Validation Genotyping (Stage 2).**

|               | Mayo Control (N=789) | UCSF Control (N=512) | Mayo A2 (N=65) | UCSF A2 (N=84) | Mayo A3 (N=188) | UCSF A3 (N=104) | Mayo GBM (N=330) | UCSF GBM (N=390) | Mayo Oligo (N=98) | UCSF Oligo (N=168) | Mayo MOA (N=166) | UCSF MOA (N=59) |
|---------------|----------------------|----------------------|----------------|----------------|-----------------|-----------------|------------------|------------------|-------------------|--------------------|------------------|-----------------|
| <b>Age</b>    |                      |                      |                |                |                 |                 |                  |                  |                   |                    |                  |                 |
| Mean (SD)     | 49.8 (14.1)          | 57.9 (15.3)          | 42.2 (13.6)    | 42.0 (13.6)    | 48.4 (14.8)     | 44.3 (13.9)     | 55.7 (12.4)      | 56.5 (12.9)      | 41.6 (10.7)       | 45.3 (12.1)        | 39.0 (11.5)      | 39.3 (11.6)     |
| Median        | 49                   | 58                   | 41             | 40             | 48              | 44              | 56               | 57               | 41                | 44                 | 38               | 37              |
| <b>Gender</b> |                      |                      |                |                |                 |                 |                  |                  |                   |                    |                  |                 |
| Male          | 450 (57.0%)          | 289 (56.4%)          | 38 (58.5%)     | 58 (69.0%)     | 103 (54.8%)     | 55 (52.9%)      | 207 (62.7%)      | 252 (64.6%)      | 50 (51.0%)        | 94 (56.0%)         | 91 (54.8%)       | 37 (62.7%)      |
| Female        | 339 (43.0%)          | 223 (43.6%)          | 27 (41.5%)     | 26 (31.0%)     | 85 (45.2%)      | 49 (47.1%)      | 123 (37.3%)      | 138 (35.4%)      | 48 (49.0%)        | 74 (44.0%)         | 75 (45.2%)       | 22 (37.3%)      |

See Supplementary Table 1A for abbreviations used; Oligo is oligodendroglioma.

## Supplementary Table 3: Association from Stage 2 genotyping of seven SNPs in chromosome 8q24.21 (CCDC26) region with glioma, stratified by morphology type

| Mayo Clinic |           |                     | All Gliomas (N=852) |      |           |          |                        |          | Oligodendrogliomas (N=98) |           |          |                        |  |  |
|-------------|-----------|---------------------|---------------------|------|-----------|----------|------------------------|----------|---------------------------|-----------|----------|------------------------|--|--|
| SNP         | BP        | Control MAF (N=789) | Case MAF            | OR   | 95% CI    | p        | -log <sub>10</sub> (p) | Case MAF | OR                        | 95% CI    | p        | -log <sub>10</sub> (p) |  |  |
| rs72714236  | 130468065 | 0.051               | 0.120               | 2.47 | 1.89 3.25 | 6.41E-11 | 10.19                  | 0.189    | 4.09                      | 2.59 6.46 | 1.51E-09 | 8.82                   |  |  |
| rs72714295  | 130569398 | 0.066               | 0.142               | 2.30 | 1.80 2.93 | 3.17E-11 | 10.50                  | 0.219    | 3.58                      | 2.36 5.44 | 2.14E-09 | 8.67                   |  |  |
| rs72714302  | 130588045 | 0.049               | 0.124               | 2.64 | 2.01 3.47 | 3.43E-12 | 11.46                  | 0.214    | 4.74                      | 3.04 7.38 | 5.83E-12 | 11.23                  |  |  |
| rs72716319  | 130599332 | 0.050               | 0.125               | 2.64 | 2.01 3.46 | 3.11E-12 | 11.51                  | 0.209    | 4.65                      | 2.98 7.26 | 1.32E-11 | 10.88                  |  |  |
| rs72716328  | 130606932 | 0.046               | 0.117               | 2.74 | 2.06 3.65 | 3.79E-12 | 11.42                  | 0.184    | 4.25                      | 2.28 6.73 | 7.63E-10 | 9.12                   |  |  |
| rs147958197 | 130631395 | 0.041               | 0.112               | 2.90 | 2.16 3.90 | 2.01E-12 | 11.70                  | 0.194    | 5.82                      | 3.59 9.43 | 9.49E-13 | 12.02                  |  |  |
| rs55705857  | 130645692 | 0.052               | 0.145               | 3.03 | 2.32 3.95 | 4.05E-16 | 15.39                  | 0.242    | 5.92                      | 3.79 9.25 | 6.21E-15 | 14.21                  |  |  |

  

| UCSF        |           |                      | All Gliomas (N=810) |      |           |          |                        |          | Oligodendrogliomas (N=168) |            |          |                        |  |  |
|-------------|-----------|----------------------|---------------------|------|-----------|----------|------------------------|----------|----------------------------|------------|----------|------------------------|--|--|
| SNP         | BP        | Control MAF (N= 512) | Case MAF            | OR   | 95% CI    | p        | -log <sub>10</sub> (p) | Case MAF | OR                         | 95% CI     | p        | -log <sub>10</sub> (p) |  |  |
| rs72714236  | 130468065 | 0.046                | 0.102               | 2.05 | 1.45 2.90 | 5.46E-05 | 4.26                   | 0.164    | 3.74                       | 2.34 5.98  | 3.42E-08 | 7.47                   |  |  |
| rs72714295  | 130569398 | 0.054                | 0.124               | 2.30 | 1.66 3.18 | 5.00E-07 | 6.30                   | 0.194    | 4.29                       | 2.75 6.68  | 1.34E-10 | 9.87                   |  |  |
| rs72714302  | 130588045 | 0.033                | 0.109               | 3.02 | 2.04 4.47 | 3.12E-08 | 7.51                   | 0.180    | 6.15                       | 3.71 10.20 | 2.08E-12 | 11.68                  |  |  |
| rs72716319  | 130599332 | 0.033                | 0.108               | 3.00 | 2.03 4.44 | 4.07E-08 | 7.39                   | 0.176    | 5.91                       | 3.56 9.82  | 6.79E-12 | 11.17                  |  |  |
| rs72716328  | 130606932 | 0.029                | 0.107               | 3.28 | 2.17 4.94 | 1.46E-08 | 7.84                   | 0.170    | 6.33                       | 3.74 10.73 | 6.63E-12 | 11.18                  |  |  |
| rs147958197 | 130631395 | 0.030                | 0.104               | 2.98 | 2.00 4.46 | 1.03E-07 | 6.99                   | 0.182    | 6.32                       | 3.78 10.57 | 1.96E-12 | 11.71                  |  |  |
| rs55705857  | 130645692 | 0.036                | 0.132               | 3.33 | 2.29 4.83 | 2.38E-10 | 9.62                   | 0.214    | 6.79                       | 4.19 11.01 | 8.63E-15 | 14.06                  |  |  |

  

| Mayo and UCSF |           |                      | All Gliomas (N=1662) |      |           |          |                        |          | Oligodendrogliomas (N=266) |           |          |                        |  |  |
|---------------|-----------|----------------------|----------------------|------|-----------|----------|------------------------|----------|----------------------------|-----------|----------|------------------------|--|--|
| SNP           | BP        | Control MAF (N=1301) | Case MAF             | OR   | 95% CI    | p        | -log <sub>10</sub> (p) | Case MAF | OR                         | 95% CI    | p        | -log <sub>10</sub> (p) |  |  |
| rs72714236    | 130468065 | 0.049                | 0.112                | 2.29 | 1.85 2.84 | 2.45E-14 | 13.61                  | 0.173    | 3.93                       | 2.83 5.46 | 2.89E-16 | 15.54                  |  |  |
| rs72714295    | 130569398 | 0.061                | 0.134                | 2.27 | 1.87 2.75 | 1.77E-16 | 15.75                  | 0.203    | 3.88                       | 2.87 5.26 | 1.77E-18 | 17.75                  |  |  |
| rs72714302    | 130588045 | 0.043                | 0.117                | 2.76 | 2.21 3.45 | 4.19E-19 | 18.38                  | 0.193    | 5.34                       | 3.83 7.44 | 4.97E-23 | 22.30                  |  |  |
| rs72716319    | 130599332 | 0.043                | 0.117                | 2.75 | 2.20 3.43 | 5.64E-19 | 18.25                  | 0.188    | 5.18                       | 3.71 7.22 | 3.72E-22 | 21.43                  |  |  |
| rs72716328    | 130606932 | 0.039                | 0.112                | 2.90 | 2.30 3.66 | 2.45E-19 | 18.61                  | 0.175    | 5.07                       | 3.59 7.14 | 1.83E-20 | 19.74                  |  |  |
| rs147958197   | 130631395 | 0.037                | 0.109                | 2.93 | 2.31 3.71 | 7.25E-19 | 18.14                  | 0.186    | 6.09                       | 4.28 8.64 | 6.57E-24 | 23.18                  |  |  |
| rs55705857    | 130645692 | 0.046                | 0.139                | 3.11 | 2.51 3.85 | 5.00E-25 | 24.30                  | 0.225    | 6.32                       | 4.56 8.77 | 2.15E-28 | 27.67                  |  |  |

\* Gold highlighted cells are significant after Bonferroni correction ( $p < 0.00030$ ); Yellow highlighted cells are nominally significant ( $p < 0.05$ )

# Supplementary Table 3: Association from Stage 2 genotyping of seven SNPs in chromosome 8q24.21 (CCDC26) region with glioma, stratified by morphology type

| <b>Mayo Clinic</b> |           |                     | <b>Mixed Oligoastrocytomas (N=166)</b> |      |           |          |           |          | <b>Oligodendrogliomas and Mixed Oligoastrocytomas (N=264)</b> |           |          |           |  |  |
|--------------------|-----------|---------------------|----------------------------------------|------|-----------|----------|-----------|----------|---------------------------------------------------------------|-----------|----------|-----------|--|--|
| SNP                | BP        | Control MAF (N=789) | Case MAF                               | OR   | 95% CI    | p        | -log10(p) | Case MAF | OR                                                            | 95% CI    | p        | -log10(p) |  |  |
| rs72714236         | 130468065 | 0.051               | 0.163                                  | 3.36 | 2.24 5.05 | 5.50E-09 | 8.26      | 0.172    | 3.6                                                           | 2.54 5.11 | 7.60E-13 | 12.12     |  |  |
| rs72714295         | 130569398 | 0.066               | 0.181                                  | 2.88 | 1.97 4.21 | 5.13E-08 | 7.29      | 0.195    | 3.12                                                          | 2.26 4.30 | 4.49E-12 | 11.35     |  |  |
| rs72714302         | 130588045 | 0.049               | 0.166                                  | 3.57 | 2.38 5.35 | 7.26E-10 | 9.14      | 0.184    | 3.96                                                          | 2.80 5.60 | 7.76E-15 | 14.11     |  |  |
| rs72716319         | 130599332 | 0.050               | 0.166                                  | 3.47 | 2.32 5.20 | 1.48E-09 | 8.83      | 0.182    | 3.88                                                          | 2.74 5.49 | 1.77E-14 | 13.75     |  |  |
| rs72716328         | 130606932 | 0.046               | 0.157                                  | 3.64 | 2.40 5.52 | 1.20E-09 | 8.92      | 0.167    | 3.87                                                          | 2.70 5.54 | 1.70E-13 | 12.77     |  |  |
| rs147958197        | 130631395 | 0.041               | 0.136                                  | 3.39 | 2.20 5.23 | 3.58E-08 | 7.45      | 0.157    | 4.15                                                          | 2.85 6.04 | 1.08E-13 | 12.97     |  |  |
| rs55705857         | 130645692 | 0.052               | 0.204                                  | 3.97 | 2.71 5.81 | 1.47E-12 | 11.83     | 0.218    | 4.72                                                          | 3.37 6.62 | 2.14E-19 | 18.67     |  |  |

  

| <b>UCSF</b> |           |                      | <b>Mixed Oligoastrocytomas (N=59)</b> |      |           |           |           |          | <b>Oligodendrogliomas and Mixed Oligoastrocytomas (N=227)</b> |           |          |           |  |  |
|-------------|-----------|----------------------|---------------------------------------|------|-----------|-----------|-----------|----------|---------------------------------------------------------------|-----------|----------|-----------|--|--|
| SNP         | BP        | Control MAF (N= 512) | Case MAF                              | OR   | 95% CI    | p         | -log10(p) | Case MAF | OR                                                            | 95% CI    | p        | -log10(p) |  |  |
| rs72714236  | 130468065 | 0.046                | 0.102                                 | 2.05 | 0.96 4.35 | 0.062     | 1.21      | 0.148    | 3.24                                                          | 2.06 5.09 | 3.51E-07 | 6.45      |  |  |
| rs72714295  | 130569398 | 0.054                | 0.119                                 | 2.12 | 1.05 4.30 | 0.036     | 1.44      | 0.174    | 3.70                                                          | 2.41 5.68 | 2.08E-09 | 8.68      |  |  |
| rs72714302  | 130588045 | 0.033                | 0.110                                 | 3.32 | 1.48 7.43 | 0.0036    | 2.44      | 0.162    | 5.24                                                          | 3.21 8.58 | 4.21E-11 | 10.38     |  |  |
| rs72716319  | 130599332 | 0.033                | 0.095                                 | 3.03 | 1.28 7.17 | 0.012     | 1.94      | 0.155    | 5.05                                                          | 3.08 8.29 | 1.48E-10 | 9.83      |  |  |
| rs72716328  | 130606932 | 0.029                | 0.110                                 | 3.80 | 1.66 8.71 | 0.0016    | 2.80      | 0.154    | 5.49                                                          | 3.29 9.17 | 7.87E-11 | 10.10     |  |  |
| rs147958197 | 130631395 | 0.030                | 0.136                                 | 4.46 | 2.02 9.83 | 0.0002162 | 3.67      | 0.170    | 5.51                                                          | 3.35 9.07 | 1.82E-11 | 10.74     |  |  |
| rs55705857  | 130645692 | 0.036                | 0.153                                 | 4.49 | 2.11 9.55 | 9.79E-05  | 4.01      | 0.198    | 5.86                                                          | 3.67 9.35 | 1.26E-13 | 12.90     |  |  |

  

| <b>Mayo and UCSF</b> |           |                      | <b>Mixed Oligoastrocytomas (N=225)</b> |      |           |          |           |          | <b>Oligodendrogliomas and Mixed Oligoastrocytomas (N=491)</b> |           |          |           |  |  |
|----------------------|-----------|----------------------|----------------------------------------|------|-----------|----------|-----------|----------|---------------------------------------------------------------|-----------|----------|-----------|--|--|
| SNP                  | BP        | Control MAF (N=1301) | Case MAF                               | OR   | 95% CI    | p        | -log10(p) | Case MAF | OR                                                            | 95% CI    | p        | -log10(p) |  |  |
| rs72714236           | 130468065 | 0.049                | 0.147                                  | 3.02 | 2.11 4.32 | 1.68E-09 | 8.78      | 0.161    | 3.47                                                          | 2.63 4.58 | 1.53E-18 | 17.81     |  |  |
| rs72714295           | 130569398 | 0.061                | 0.164                                  | 2.68 | 1.92 3.74 | 7.79E-09 | 8.11      | 0.185    | 3.31                                                          | 2.56 4.28 | 6.44E-20 | 19.19     |  |  |
| rs72714302           | 130588045 | 0.043                | 0.151                                  | 3.55 | 2.47 5.11 | 7.06E-12 | 11.15     | 0.174    | 4.37                                                          | 3.29 5.80 | 1.67E-24 | 23.78     |  |  |
| rs72716319           | 130599332 | 0.043                | 0.147                                  | 3.41 | 2.36 4.91 | 5.33E-11 | 10.27     | 0.169    | 4.25                                                          | 3.20 5.64 | 1.44E-23 | 22.84     |  |  |
| rs72716328           | 130606932 | 0.039                | 0.144                                  | 3.70 | 2.55 5.38 | 5.78E-12 | 11.24     | 0.161    | 4.36                                                          | 3.25 5.85 | 6.47E-23 | 22.19     |  |  |
| rs147958197          | 130631395 | 0.037                | 0.136                                  | 3.67 | 2.51 5.36 | 1.84E-11 | 10.73     | 0.163    | 4.64                                                          | 3.44 6.25 | 6.24E-24 | 23.20     |  |  |
| rs55705857           | 130645692 | 0.046                | 0.191                                  | 4.09 | 2.91 5.75 | 4.82E-16 | 15.32     | 0.209    | 5.12                                                          | 3.89 6.72 | 1.13E-31 | 30.95     |  |  |

\* Gold highlighted cells are significant after Bonferroni correction (p<0.00030); Yellow highlighted cells are nominally significant (p<0.05)

## Supplementary Table 3: Association from Stage 2 genotyping of seven SNPs in chromosome 8q24.21 (CCDC26) region with glioma, stratified by morphology type

| Mayo Clinic |           |                     | Astrocytomas (N=65) |      |        |      |         |           | Anaplastic Astrocytomas (N=188) |      |        |      |           |           |
|-------------|-----------|---------------------|---------------------|------|--------|------|---------|-----------|---------------------------------|------|--------|------|-----------|-----------|
| SNP         | BP        | Control MAF (N=789) | Case MAF            | OR   | 95% CI |      | p       | -log10(p) | Case MAF                        | OR   | 95% CI |      | p         | -log10(p) |
| rs72714236  | 130468065 | 0.051               | 0.115               | 2.19 | 1.22   | 3.94 | 0.00848 | 2.07      | 0.104                           | 2.14 | 1.42   | 3.20 | 0.00025   | 3.61      |
| rs72714295  | 130569398 | 0.066               | 0.169               | 2.61 | 1.56   | 4.37 | 0.00027 | 3.57      | 0.112                           | 1.78 | 1.21   | 2.61 | 0.0033    | 2.48      |
| rs72714302  | 130588045 | 0.049               | 0.131               | 2.58 | 1.47   | 4.52 | 0.00094 | 3.02      | 0.104                           | 2.20 | 1.46   | 3.30 | 0.00015   | 3.83      |
| rs72716319  | 130599332 | 0.050               | 0.131               | 2.52 | 1.44   | 4.42 | 0.0013  | 2.90      | 0.109                           | 2.31 | 1.54   | 3.45 | 4.61E-05  | 4.34      |
| rs72716328  | 130606932 | 0.046               | 0.131               | 2.69 | 1.53   | 4.72 | 0.00059 | 3.23      | 0.104                           | 2.37 | 1.57   | 3.58 | 4.07E-05  | 4.39      |
| rs147958197 | 130631395 | 0.041               | 0.123               | 2.94 | 1.62   | 5.32 | 0.00037 | 3.43      | 0.113                           | 2.94 | 1.94   | 4.45 | 3.848E-07 | 6.41      |
| rs55705857  | 130645692 | 0.052               | 0.131               | 2.35 | 1.34   | 4.12 | 0.0029  | 2.53      | 0.138                           | 2.88 | 1.97   | 4.20 | 4.485E-08 | 7.35      |

  

| UCSF        |           |                      | Astrocytomas (N=84) |      |        |       |           |           | Anaplastic Astrocytomas (N=104) |      |        |      |           |           |
|-------------|-----------|----------------------|---------------------|------|--------|-------|-----------|-----------|---------------------------------|------|--------|------|-----------|-----------|
| SNP         | BP        | Control MAF (N= 512) | Case MAF            | OR   | 95% CI |       | p         | -log10(p) | Case MAF                        | OR   | 95% CI |      | p         | -log10(p) |
| rs72714236  | 130468065 | 0.046                | 0.137               | 2.98 | 1.61   | 5.52  | 0.00052   | 3.29      | 0.106                           | 2.39 | 1.31   | 4.37 | 0.0046    | 2.34      |
| rs72714295  | 130569398 | 0.054                | 0.151               | 3.19 | 1.75   | 5.81  | 0.0001567 | 3.80      | 0.135                           | 2.54 | 1.47   | 4.39 | 0.000835  | 3.08      |
| rs72714302  | 130588045 | 0.033                | 0.149               | 5.06 | 2.58   | 9.93  | 2.50E-06  | 5.60      | 0.121                           | 3.74 | 2.00   | 6.97 | 3.48E-05  | 4.46      |
| rs72716319  | 130599332 | 0.033                | 0.149               | 5.06 | 2.58   | 9.93  | 2.50E-06  | 5.60      | 0.125                           | 3.92 | 2.11   | 7.27 | 1.50E-05  | 4.82      |
| rs72716328  | 130606932 | 0.029                | 0.149               | 5.74 | 2.87   | 11.50 | 8.02E-07  | 6.10      | 0.125                           | 4.33 | 2.30   | 8.15 | 5.524E-06 | 5.26      |
| rs147958197 | 130631395 | 0.030                | 0.137               | 5.05 | 2.54   | 10.06 | 4.12E-06  | 5.38      | 0.096                           | 2.99 | 1.55   | 5.76 | 0.0011    | 2.97      |
| rs55705857  | 130645692 | 0.036                | 0.179               | 5.93 | 3.12   | 11.28 | 5.74E-08  | 7.24      | 0.149                           | 4.41 | 2.45   | 7.95 | 7.372E-07 | 6.13      |

  

| Mayo and UCSF |           |                      | Astrocytomas (N=149) |      |        |      |          |           | Anaplastic Astrocytomas (N=292) |      |        |      |           |           |
|---------------|-----------|----------------------|----------------------|------|--------|------|----------|-----------|---------------------------------|------|--------|------|-----------|-----------|
| SNP           | BP        | Control MAF (N=1301) | Case MAF             | OR   | 95% CI |      | p        | -log10(p) | Case MAF                        | OR   | 95% CI |      | p         | -log10(p) |
| rs72714236    | 130468065 | 0.049                | 0.128                | 2.54 | 1.68   | 3.85 | 1.14E-05 | 4.95      | 0.105                           | 2.19 | 1.57   | 3.05 | 3.942E-06 | 5.40      |
| rs72714295    | 130569398 | 0.061                | 0.159                | 2.76 | 1.88   | 4.05 | 2.44E-07 | 6.61      | 0.120                           | 2.00 | 1.47   | 2.72 | 1.04E-05  | 4.98      |
| rs72714302    | 130588045 | 0.043                | 0.141                | 3.36 | 2.22   | 5.10 | 1.15E-08 | 7.94      | 0.110                           | 2.60 | 1.86   | 3.64 | 2.133E-08 | 7.67      |
| rs72716319    | 130599332 | 0.043                | 0.141                | 3.30 | 2.17   | 5.00 | 1.91E-08 | 7.72      | 0.115                           | 2.71 | 1.95   | 3.77 | 3.568E-09 | 8.45      |
| rs72716328    | 130606932 | 0.039                | 0.141                | 3.58 | 2.35   | 5.45 | 2.78E-09 | 8.56      | 0.111                           | 2.82 | 2.01   | 3.94 | 1.70E-09  | 8.77      |
| rs147958197   | 130631395 | 0.037                | 0.131                | 3.64 | 2.35   | 5.62 | 6.75E-09 | 8.17      | 0.107                           | 2.88 | 2.04   | 4.06 | 1.919E-09 | 8.72      |
| rs55705857    | 130645692 | 0.046                | 0.158                | 3.43 | 2.29   | 5.12 | 2.02E-09 | 8.69      | 0.142                           | 3.18 | 2.33   | 4.34 | 3.141E-13 | 12.50     |

\* Gold highlighted cells are significant after Bonferroni correction ( $p < 0.00030$ ); Yellow highlighted cells are nominally significant ( $p < 0.05$ )

## Supplementary Table 3: Association from Stage 2 genotyping of seven SNPs in chromosome 8q24.21 (CCDC26) region with glioma, stratified by morphology type

| Mayo Clinic |           |                     | Glioblastomas (N=330) |      |           |          |           |  |
|-------------|-----------|---------------------|-----------------------|------|-----------|----------|-----------|--|
| SNP         | BP        | Control MAF (N=789) | Case MAF              | OR   | 95% CI    | p        | -log10(p) |  |
| rs72714236  | 130468065 | 0.051               | 0.089                 | 1.94 | 1.35 2.78 | 0.00032  | 3.49      |  |
| rs72714295  | 130569398 | 0.066               | 0.111                 | 1.85 | 1.33 2.56 | 0.00023  | 3.63      |  |
| rs72714302  | 130588045 | 0.049               | 0.088                 | 1.92 | 1.33 2.75 | 0.00045  | 3.34      |  |
| rs72716319  | 130599332 | 0.050               | 0.088                 | 1.91 | 1.33 2.74 | 0.00050  | 3.30      |  |
| rs72716328  | 130606932 | 0.046               | 0.084                 | 2.03 | 1.39 2.96 | 0.00025  | 3.61      |  |
| rs147958197 | 130631395 | 0.041               | 0.076                 | 2.14 | 1.43 3.20 | 0.00022  | 3.67      |  |
| rs55705857  | 130645692 | 0.052               | 0.094                 | 2.06 | 1.44 2.96 | 8.39E-05 | 4.08      |  |

| UCSF        |           |                      | Glioblastomas N=390) |      |           |          |           |  |
|-------------|-----------|----------------------|----------------------|------|-----------|----------|-----------|--|
| SNP         | BP        | Control MAF (N= 512) | Case MAF             | OR   | 95% CI    | p        | -log10(p) |  |
| rs72714236  | 130468065 | 0.046                | 0.069                | 1.55 | 1.03 2.34 | 0.03647  | 1.44      |  |
| rs72714295  | 130569398 | 0.054                | 0.090                | 1.80 | 1.24 2.62 | 0.0022   | 2.66      |  |
| rs72714302  | 130588045 | 0.033                | 0.069                | 2.21 | 1.41 3.47 | 0.00059  | 3.23      |  |
| rs72716319  | 130599332 | 0.033                | 0.069                | 2.21 | 1.41 3.47 | 0.00059  | 3.23      |  |
| rs72716328  | 130606932 | 0.029                | 0.067                | 2.39 | 1.49 3.83 | 0.00028  | 3.55      |  |
| rs147958197 | 130631395 | 0.030                | 0.064                | 2.13 | 1.34 3.39 | 0.0014   | 2.85      |  |
| rs55705857  | 130645692 | 0.036                | 0.081                | 2.33 | 1.52 3.56 | 9.84E-05 | 4.01      |  |

| Mayo and UCSF |           |                      | Glioblastomas (N=720) |      |           |           |           |  |
|---------------|-----------|----------------------|-----------------------|------|-----------|-----------|-----------|--|
| SNP           | BP        | Control MAF (N=1301) | Case MAF              | OR   | 95% CI    | p         | -log10(p) |  |
| rs72714236    | 130468065 | 0.049                | 0.078                 | 1.74 | 1.33 2.27 | 4.91E-05  | 4.31      |  |
| rs72714295    | 130569398 | 0.061                | 0.099                 | 1.79 | 1.40 2.28 | 2.694E-06 | 5.57      |  |
| rs72714302    | 130588045 | 0.043                | 0.078                 | 2.01 | 1.52 2.65 | 8.023E-07 | 6.10      |  |
| rs72716319    | 130599332 | 0.043                | 0.078                 | 2.00 | 1.52 2.64 | 9.563E-07 | 6.02      |  |
| rs72716328    | 130606932 | 0.039                | 0.074                 | 2.13 | 1.60 2.84 | 2.512E-07 | 6.60      |  |
| rs147958197   | 130631395 | 0.037                | 0.070                 | 2.09 | 1.55 2.82 | 1.29E-06  | 5.89      |  |
| rs55705857    | 130645692 | 0.046                | 0.087                 | 2.12 | 1.62 2.77 | 4.462E-08 | 7.35      |  |

\* Gold highlighted cells are significant after Bonferroni correction ( $p < 0.00030$ ); Yellow highlighted cells are nominally significant ( $p < 0.05$ )

## Supplementary Table 4: Association from Stage 2 genotyping of seven SNPs in chromosome 8q24.21 (CCDC26) region with glioma, stratified by morphology and IDH1/2 status

### Mayo Clinic

| SNP         | BP        | Control MAF (N=789) | IDH1/2 Positive Gliomas (N=132) |      |        |      |          | IDH1/2 Negative Gliomas (N=98) |          |      |        |      |      |           |
|-------------|-----------|---------------------|---------------------------------|------|--------|------|----------|--------------------------------|----------|------|--------|------|------|-----------|
|             |           |                     | Case MAF                        | OR   | 95% CI |      | p        | -log10(p)                      | Case MAF | OR   | 95% CI |      | p    | -log10(p) |
| rs72714236  | 130468065 | 0.051               | 0.155                           | 3.50 | 2.26   | 5.43 | 2.10E-08 | 7.68                           | 0.031    | 0.62 | 0.27   | 1.43 | 0.27 | 0.58      |
| rs72714295  | 130569398 | 0.066               | 0.174                           | 2.81 | 1.87   | 4.23 | 7.58E-07 | 6.12                           | 0.062    | 0.95 | 0.52   | 1.77 | 0.88 | 0.05      |
| rs72714302  | 130588045 | 0.049               | 0.155                           | 3.34 | 2.16   | 5.16 | 5.94E-08 | 7.23                           | 0.036    | 0.73 | 0.33   | 1.60 | 0.44 | 0.36      |
| rs72716319  | 130599332 | 0.050               | 0.155                           | 3.25 | 2.10   | 5.01 | 1.10E-07 | 6.96                           | 0.036    | 0.73 | 0.33   | 1.60 | 0.43 | 0.37      |
| rs72716328  | 130606932 | 0.046               | 0.148                           | 3.32 | 2.13   | 5.18 | 1.14E-07 | 6.94                           | 0.031    | 0.71 | 0.31   | 1.65 | 0.43 | 0.37      |
| rs147958197 | 130631395 | 0.041               | 0.159                           | 4.23 | 2.70   | 6.63 | 2.89E-10 | 9.54                           | 0.041    | 1.09 | 0.51   | 2.33 | 0.83 | 0.08      |
| rs55705857  | 130645692 | 0.052               | 0.205                           | 4.25 | 2.83   | 6.38 | 3.49E-12 | 11.46                          | 0.046    | 0.97 | 0.48   | 1.96 | 0.94 | 0.03      |

### UCSF

| SNP         | BP        | Control MAF (N= 512) | IDH1/2 Positive Gliomas (N=201) |      |        |       |          | IDH1/2 Negative Gliomas (N=163) |          |      |        |      |        |           |
|-------------|-----------|----------------------|---------------------------------|------|--------|-------|----------|---------------------------------|----------|------|--------|------|--------|-----------|
|             |           |                      | Case MAF                        | OR   | 95% CI |       | p        | -log10(p)                       | Case MAF | OR   | 95% CI |      | p      | -log10(p) |
| rs72714236  | 130468065 | 0.046                | 0.124                           | 2.86 | 1.71   | 4.79  | 6.32E-05 | 4.20                            | 0.071    | 1.60 | 0.95   | 2.68 | 0.078  | 1.11      |
| rs72714295  | 130569398 | 0.054                | 0.154                           | 3.29 | 2.05   | 5.28  | 8.13E-07 | 6.09                            | 0.092    | 1.84 | 1.15   | 2.94 | 0.011  | 1.95      |
| rs72714302  | 130588045 | 0.033                | 0.145                           | 4.91 | 2.84   | 8.49  | 1.29E-08 | 7.89                            | 0.067    | 2.22 | 1.25   | 3.93 | 0.0065 | 2.18      |
| rs72716319  | 130599332 | 0.033                | 0.147                           | 5.01 | 2.90   | 8.65  | 7.31E-09 | 8.14                            | 0.064    | 2.11 | 1.18   | 3.77 | 0.012  | 1.92      |
| rs72716328  | 130606932 | 0.029                | 0.147                           | 5.72 | 3.25   | 10.07 | 1.44E-09 | 8.84                            | 0.061    | 2.27 | 1.24   | 4.13 | 0.0077 | 2.11      |
| rs147958197 | 130631395 | 0.030                | 0.152                           | 4.87 | 2.81   | 8.44  | 1.70E-08 | 7.77                            | 0.058    | 2.04 | 1.11   | 3.72 | 0.021  | 1.67      |
| rs55705857  | 130645692 | 0.036                | 0.182                           | 5.62 | 3.35   | 9.42  | 6.00E-11 | 10.22                           | 0.077    | 2.35 | 1.36   | 4.05 | 0.0022 | 2.65      |

### Mayo and UCSF

| SNP         | BP        | Control MAF (N=1301) | IDH1/2 Positive Gliomas (N=333) |      |        |      |          | IDH1/2 Negative Gliomas (N=261) |          |      |        |      |       |           |
|-------------|-----------|----------------------|---------------------------------|------|--------|------|----------|---------------------------------|----------|------|--------|------|-------|-----------|
|             |           |                      | Case MAF                        | OR   | 95% CI |      | p        | -log10(p)                       | Case MAF | OR   | 95% CI |      | p     | -log10(p) |
| rs72714236  | 130468065 | 0.049                | 0.137                           | 3.25 | 2.32   | 4.54 | 6.54E-12 | 11.18                           | 0.056    | 1.15 | 0.76   | 1.76 | 0.50  | 0.30      |
| rs72714295  | 130569398 | 0.061                | 0.162                           | 2.98 | 2.19   | 4.05 | 3.43E-12 | 11.46                           | 0.081    | 1.39 | 0.97   | 1.99 | 0.071 | 1.15      |
| rs72714302  | 130588045 | 0.043                | 0.149                           | 3.92 | 2.80   | 5.50 | 2.32E-15 | 14.63                           | 0.056    | 1.40 | 0.91   | 2.15 | 0.13  | 0.89      |
| rs72716319  | 130599332 | 0.043                | 0.150                           | 3.88 | 2.77   | 5.43 | 2.87E-15 | 14.54                           | 0.054    | 1.34 | 0.87   | 2.07 | 0.19  | 0.73      |
| rs72716328  | 130606932 | 0.039                | 0.147                           | 4.13 | 2.93   | 5.82 | 5.03E-16 | 15.30                           | 0.050    | 1.38 | 0.88   | 2.17 | 0.16  | 0.79      |
| rs147958197 | 130631395 | 0.037                | 0.155                           | 4.56 | 3.23   | 6.45 | 7.91E-18 | 17.10                           | 0.052    | 1.53 | 0.97   | 2.41 | 0.067 | 1.17      |
| rs55705857  | 130645692 | 0.046                | 0.191                           | 4.77 | 3.47   | 6.57 | 6.56E-22 | 21.18                           | 0.065    | 1.57 | 1.04   | 2.36 | 0.030 | 1.52      |

\* Gold highlighted cells are significant after Bonferroni correction ( $p < 0.00030$ ); Yellow highlighted cells are nominally significant ( $p < 0.05$ )

\*\* INF=infinity

## Supplementary Table 4: Association from Stage 2 genotyping of seven SNPs in chromosome 8q24.21 (CCDC26) region with glioma, stratified by morphology and IDH1/2 status

| <b>Mayo Clinic</b> |           |                     | IDH1/2 Positive Astrocytomas and Anaplastic Astrocytomas (N=38) |      |        |       |          |           | IDH1/2 Negative Astrocytomas and Anaplastic Astrocytomas (N=18) |       |        |      |      |           |
|--------------------|-----------|---------------------|-----------------------------------------------------------------|------|--------|-------|----------|-----------|-----------------------------------------------------------------|-------|--------|------|------|-----------|
| SNP                | BP        | Control MAF (N=789) | Case MAF                                                        | OR   | 95% CI |       | p        | -log10(p) | Case MAF                                                        | OR    | 95% CI |      | p    | -log10(p) |
| rs72714236         | 130468065 | 0.051               | 0.145                                                           | 3.31 | 1.58   | 6.95  | 0.0015   | 2.81      | 0.028                                                           | 0.55  | 0.08   | 3.95 | 0.55 | 0.26      |
| rs72714295         | 130569398 | 0.066               | 0.145                                                           | 2.21 | 1.09   | 4.49  | 0.028    | 1.55      | 0.056                                                           | 0.82  | 0.19   | 3.45 | 0.78 | 0.11      |
| rs72714302         | 130588045 | 0.049               | 0.118                                                           | 2.57 | 1.19   | 5.56  | 0.017    | 1.77      | 0.028                                                           | 0.54  | 0.07   | 3.93 | 0.54 | 0.27      |
| rs72716319         | 130599332 | 0.050               | 0.118                                                           | 2.43 | 1.12   | 5.27  | 0.025    | 1.60      | 0.028                                                           | 0.54  | 0.07   | 3.90 | 0.54 | 0.27      |
| rs72716328         | 130606932 | 0.046               | 0.118                                                           | 2.63 | 1.21   | 5.70  | 0.014    | 1.85      | 0.000                                                           | INF** | INF    | INF  | 1.00 | 0.00      |
| rs147958197        | 130631395 | 0.041               | 0.171                                                           | 5.02 | 2.45   | 10.26 | 1.02E-05 | 4.99      | 0.028                                                           | 0.68  | 0.09   | 5.04 | 0.70 | 0.15      |
| rs55705857         | 130645692 | 0.052               | 0.197                                                           | 4.10 | 2.12   | 7.95  | 2.81E-05 | 4.55      | 0.028                                                           | 0.54  | 0.07   | 3.93 | 0.54 | 0.27      |

  

| <b>UCSF</b> |           |                      | IDH1/2 Positive Astrocytomas and Anaplastic Astrocytomas (N=83) |      |        |       |          |           | IDH1/2 Negative Astrocytomas and Anaplastic Astrocytomas (N=15) |      |        |       |       |           |
|-------------|-----------|----------------------|-----------------------------------------------------------------|------|--------|-------|----------|-----------|-----------------------------------------------------------------|------|--------|-------|-------|-----------|
| SNP         | BP        | Control MAF (N= 512) | Case MAF                                                        | OR   | 95% CI |       | p        | -log10(p) | Case MAF                                                        | OR   | 95% CI |       | p     | -log10(p) |
| rs72714236  | 130468065 | 0.046                | 0.121                                                           | 2.58 | 1.31   | 5.07  | 0.0060   | 2.22      | 0.067                                                           | 1.41 | 0.33   | 5.97  | 0.64  | 0.19      |
| rs72714295  | 130569398 | 0.054                | 0.169                                                           | 3.46 | 1.86   | 6.41  | 8.20E-05 | 4.09      | 0.100                                                           | 1.88 | 0.55   | 6.37  | 0.31  | 0.51      |
| rs72714302  | 130588045 | 0.033                | 0.159                                                           | 5.23 | 2.56   | 10.69 | 5.63E-06 | 5.25      | 0.067                                                           | 2.11 | 0.45   | 9.92  | 0.34  | 0.46      |
| rs72716319  | 130599332 | 0.033                | 0.163                                                           | 5.54 | 2.73   | 11.24 | 2.22E-06 | 5.65      | 0.067                                                           | 2.11 | 0.45   | 9.92  | 0.34  | 0.46      |
| rs72716328  | 130606932 | 0.029                | 0.163                                                           | 6.38 | 3.07   | 13.28 | 7.20E-07 | 6.14      | 0.067                                                           | 2.46 | 0.52   | 11.59 | 0.26  | 0.59      |
| rs147958197 | 130631395 | 0.030                | 0.157                                                           | 4.73 | 2.31   | 9.68  | 2.12E-05 | 4.67      | 0.067                                                           | 2.46 | 0.52   | 11.59 | 0.25  | 0.60      |
| rs55705857  | 130645692 | 0.036                | 0.199                                                           | 6.47 | 3.29   | 12.73 | 6.45E-08 | 7.19      | 0.133                                                           | 4.79 | 1.43   | 16.08 | 0.011 | 1.95      |

  

| <b>Mayo and UCSF</b> |           |                      | IDH1/2 Positive Astrocytomas and Anaplastic Astrocytomas (N=121) |      |        |      |          |           | IDH1/2 Negative Astrocytomas and Anaplastic Astrocytomas (N=33) |      |        |      |      |           |
|----------------------|-----------|----------------------|------------------------------------------------------------------|------|--------|------|----------|-----------|-----------------------------------------------------------------|------|--------|------|------|-----------|
| SNP                  | BP        | Control MAF (N=1301) | Case MAF                                                         | OR   | 95% CI |      | p        | -log10(p) | Case MAF                                                        | OR   | 95% CI |      | p    | -log10(p) |
| rs72714236           | 130468065 | 0.049                | 0.128                                                            | 2.92 | 1.76   | 4.83 | 3.09E-05 | 4.51      | 0.045                                                           | 0.93 | 0.29   | 2.98 | 0.90 | 0.04      |
| rs72714295           | 130569398 | 0.061                | 0.161                                                            | 2.84 | 1.81   | 4.47 | 6.04E-06 | 5.22      | 0.076                                                           | 1.27 | 0.51   | 3.19 | 0.61 | 0.21      |
| rs72714302           | 130588045 | 0.043                | 0.146                                                            | 3.78 | 2.29   | 6.23 | 1.91E-07 | 6.72      | 0.045                                                           | 1.07 | 0.33   | 3.47 | 0.91 | 0.04      |
| rs72716319           | 130599332 | 0.043                | 0.149                                                            | 3.78 | 2.30   | 6.20 | 1.41E-07 | 6.85      | 0.045                                                           | 1.06 | 0.33   | 3.44 | 0.92 | 0.04      |
| rs72716328           | 130606932 | 0.039                | 0.149                                                            | 4.19 | 2.54   | 6.92 | 2.27E-08 | 7.64      | 0.030                                                           | 0.77 | 0.19   | 3.19 | 0.72 | 0.14      |
| rs147958197          | 130631395 | 0.037                | 0.161                                                            | 4.95 | 2.98   | 8.21 | 6.20E-10 | 9.21      | 0.045                                                           | 1.26 | 0.38   | 4.14 | 0.71 | 0.15      |
| rs55705857           | 130645692 | 0.046                | 0.198                                                            | 5.16 | 3.24   | 8.21 | 4.69E-12 | 11.33     | 0.076                                                           | 1.72 | 0.67   | 4.38 | 0.26 | 0.59      |

\* Gold highlighted cells are significant after Bonferroni correction ( $p < 0.00030$ ); Yellow highlighted cells are nominally significant ( $p < 0.05$ )

\*\* INF=infinity

## Supplementary Table 4: Association from Stage 2 genotyping of seven SNPs in chromosome 8q24.21 (CCDC26) region with glioma, stratified by morphology and IDH1/2 status

| Mayo Clinic |           |                     | IDH1/2 Negative GBMs (N=79) |      |        |       |        |           |                             |      |        |      |      |           |
|-------------|-----------|---------------------|-----------------------------|------|--------|-------|--------|-----------|-----------------------------|------|--------|------|------|-----------|
| SNP         | BP        | Control MAF (N=789) | IDH1/2 Positive GBMs (N=8)  |      |        |       |        |           | IDH1/2 Negative GBMs (N=79) |      |        |      |      |           |
|             |           |                     | Case MAF                    | OR   | 95% CI |       | p      | -log10(p) | Case MAF                    | OR   | 95% CI |      | p    | -log10(p) |
| rs72714236  | 130468065 | 0.051               | 0.250                       | 6.00 | 1.84   | 19.56 | 0.0029 | 2.53      | 0.032                       | 0.66 | 0.27   | 1.62 | 0.36 | 0.44      |
| rs72714295  | 130569398 | 0.066               | 0.250                       | 4.60 | 1.42   | 14.84 | 0.011  | 1.97      | 0.064                       | 1.01 | 0.52   | 1.98 | 0.97 | 0.01      |
| rs72714302  | 130588045 | 0.049               | 0.250                       | 6.12 | 1.88   | 19.92 | 0.0026 | 2.58      | 0.038                       | 0.79 | 0.34   | 1.84 | 0.59 | 0.23      |
| rs72716319  | 130599332 | 0.050               | 0.250                       | 6.05 | 1.85   | 19.72 | 0.0029 | 2.54      | 0.038                       | 0.79 | 0.34   | 1.83 | 0.58 | 0.24      |
| rs72716328  | 130606932 | 0.046               | 0.250                       | 6.37 | 1.98   | 20.56 | 0.0019 | 2.71      | 0.038                       | 0.90 | 0.39   | 2.08 | 0.81 | 0.09      |
| rs147958197 | 130631395 | 0.041               | 0.125                       | 3.35 | 0.71   | 15.91 | 0.1276 | 0.89      | 0.044                       | 1.22 | 0.54   | 2.75 | 0.63 | 0.20      |
| rs55705857  | 130645692 | 0.052               | 0.250                       | 5.81 | 1.77   | 19.05 | 0.0037 | 2.43      | 0.051                       | 1.11 | 0.53   | 2.32 | 0.79 | 0.10      |

  

| UCSF        |           |                      | IDH1/2 Negative GBMs (N=119) |      |        |       |          |           |                              |      |        |      |      |           |
|-------------|-----------|----------------------|------------------------------|------|--------|-------|----------|-----------|------------------------------|------|--------|------|------|-----------|
| SNP         | BP        | Control MAF (N= 512) | IDH1/2 Positive GBMs (N=35)  |      |        |       |          |           | IDH1/2 Negative GBMs (N=119) |      |        |      |      |           |
|             |           |                      | Case MAF                     | OR   | 95% CI |       | p        | -log10(p) | Case MAF                     | OR   | 95% CI |      | p    | -log10(p) |
| rs72714236  | 130468065 | 0.046                | 0.143                        | 3.12 | 1.36   | 7.15  | 0.0071   | 2.15      | 0.046                        | 1.05 | 0.53   | 2.08 | 0.90 | 0.05      |
| rs72714295  | 130569398 | 0.054                | 0.171                        | 3.75 | 1.72   | 8.18  | 0.00087  | 3.06      | 0.059                        | 1.16 | 0.63   | 2.15 | 0.63 | 0.20      |
| rs72714302  | 130588045 | 0.033                | 0.171                        | 6.68 | 2.85   | 15.65 | 1.24E-05 | 4.91      | 0.042                        | 1.36 | 0.65   | 2.85 | 0.42 | 0.38      |
| rs72716319  | 130599332 | 0.033                | 0.171                        | 6.68 | 2.85   | 15.65 | 1.24E-05 | 4.91      | 0.042                        | 1.36 | 0.65   | 2.85 | 0.42 | 0.38      |
| rs72716328  | 130606932 | 0.029                | 0.171                        | 7.62 | 3.21   | 18.11 | 4.24E-06 | 5.37      | 0.038                        | 1.37 | 0.63   | 2.99 | 0.43 | 0.37      |
| rs147958197 | 130631395 | 0.030                | 0.157                        | 6.84 | 2.84   | 16.46 | 1.79E-05 | 4.75      | 0.038                        | 1.24 | 0.57   | 2.70 | 0.58 | 0.23      |
| rs55705857  | 130645692 | 0.036                | 0.200                        | 7.33 | 3.27   | 16.45 | 1.36E-06 | 5.87      | 0.046                        | 1.33 | 0.66   | 2.72 | 0.43 | 0.37      |

  

| Mayo and UCSF |           |                      | IDH1/2 Negative GBMs (N=198) |      |        |       |          |           |                              |      |        |      |      |           |
|---------------|-----------|----------------------|------------------------------|------|--------|-------|----------|-----------|------------------------------|------|--------|------|------|-----------|
| SNP           | BP        | Control MAF (N=1301) | IDH1/2 Positive GBMs (N=43)  |      |        |       |          |           | IDH1/2 Negative GBMs (N=198) |      |        |      |      |           |
|               |           |                      | Case MAF                     | OR   | 95% CI |       | p        | -log10(p) | Case MAF                     | OR   | 95% CI |      | p    | -log10(p) |
| rs72714236    | 130468065 | 0.049                | 0.163                        | 3.81 | 1.92   | 7.56  | 0.00013  | 3.89      | 0.040                        | 0.84 | 0.49   | 1.45 | 0.53 | 0.27      |
| rs72714295    | 130569398 | 0.061                | 0.186                        | 3.9  | 2.05   | 7.41  | 3.32E-05 | 4.48      | 0.061                        | 1.04 | 0.66   | 1.63 | 0.86 | 0.06      |
| rs72714302    | 130588045 | 0.043                | 0.186                        | 6.52 | 3.28   | 12.97 | 9.19E-08 | 7.04      | 0.040                        | 1.01 | 0.59   | 1.74 | 0.97 | 0.02      |
| rs72716319    | 130599332 | 0.043                | 0.186                        | 6.44 | 3.23   | 12.81 | 1.15E-07 | 6.94      | 0.040                        | 1.01 | 0.59   | 1.74 | 0.98 | 0.01      |
| rs72716328    | 130606932 | 0.039                | 0.186                        | 7.17 | 3.58   | 14.34 | 2.67E-08 | 7.57      | 0.038                        | 1.06 | 0.61   | 1.86 | 0.84 | 0.08      |
| rs147958197   | 130631395 | 0.037                | 0.151                        | 5.63 | 2.68   | 11.81 | 5.03E-06 | 5.30      | 0.040                        | 1.18 | 0.67   | 2.05 | 0.57 | 0.24      |
| rs55705857    | 130645692 | 0.046                | 0.209                        | 6.66 | 3.43   | 12.94 | 2.17E-08 | 7.66      | 0.048                        | 1.15 | 0.69   | 1.92 | 0.58 | 0.24      |

\* Gold highlighted cells are significant after Bonferroni correction ( $p < 0.00030$ ); Yellow highlighted cells are nominally significant ( $p < 0.05$ )

\*\* INF=infinity



## Supplementary Table 4: Association from Stage 2 genotyping of seven SNPs in chromosome 8q24.21 (CCDC26) region with glioma, stratified by morphology and IDH1/2 status

| <b>Mayo Clinic</b> |           |                     | <b>IDH1/2 Positive Oligodendrogliomas and MOAs (N=86)</b> |      |           |           |           |          | <b>IDH1/2 Negative Oligodendrogliomas and MOAs (N=1)</b> |        |   |           |  |
|--------------------|-----------|---------------------|-----------------------------------------------------------|------|-----------|-----------|-----------|----------|----------------------------------------------------------|--------|---|-----------|--|
| SNP                | BP        | Control MAF (N=789) | Case MAF                                                  | OR   | 95% CI    | p         | -log10(p) | Case MAF | OR                                                       | 95% CI | p | -log10(p) |  |
| rs72714236         | 130468065 | 0.051               | 0.151                                                     | 3.29 | 1.98 5.45 | 4.09E-06  | 5.39      | -        | -                                                        | -      | - | -         |  |
| rs72714295         | 130569398 | 0.066               | 0.180                                                     | 2.9  | 1.82 4.61 | 7.62E-06  | 5.12      | -        | -                                                        | -      | - | -         |  |
| rs72714302         | 130588045 | 0.049               | 0.163                                                     | 3.46 | 2.11 5.65 | 7.932E-07 | 6.10      | -        | -                                                        | -      | - | -         |  |
| rs72716319         | 130599332 | 0.050               | 0.163                                                     | 3.36 | 2.06 5.50 | 1.29E-06  | 5.89      | -        | -                                                        | -      | - | -         |  |
| rs72716328         | 130606932 | 0.046               | 0.151                                                     | 3.38 | 2.04 5.60 | 2.35E-06  | 5.63      | -        | -                                                        | -      | - | -         |  |
| rs147958197        | 130631395 | 0.041               | 0.157                                                     | 4.09 | 2.45 6.83 | 7.046E-08 | 7.15      | -        | -                                                        | -      | - | -         |  |
| rs55705857         | 130645692 | 0.052               | 0.204                                                     | 4.08 | 2.57 6.49 | 2.483E-09 | 8.61      | -        | -                                                        | -      | - | -         |  |

  

| <b>UCSF</b> |           |                      | <b>IDH1/2 Positive Oligodendrogliomas and MOAs (N=83)</b> |      |            |           |           |          | <b>IDH1/2 Negative Oligodendrogliomas and MOAs (N=29)</b> |             |           |           |  |
|-------------|-----------|----------------------|-----------------------------------------------------------|------|------------|-----------|-----------|----------|-----------------------------------------------------------|-------------|-----------|-----------|--|
| SNP         | BP        | Control MAF (N= 512) | Case MAF                                                  | OR   | 95% CI     | p         | -log10(p) | Case MAF | OR                                                        | 95% CI      | p         | -log10(p) |  |
| rs72714236  | 130468065 | 0.046                | 0.121                                                     | 3.03 | 1.58 5.80  | 0.0008278 | 3.08      | 0.172    | 3.85                                                      | 1.733 8.56  | 0.0009372 | 3.03      |  |
| rs72714295  | 130569398 | 0.054                | 0.133                                                     | 2.95 | 1.62 5.39  | 0.0004238 | 3.37      | 0.224    | 4.78                                                      | 2.266 10.09 | 4.01E-05  | 4.40      |  |
| rs72714302  | 130588045 | 0.033                | 0.121                                                     | 4.48 | 2.25 8.93  | 2.03E-05  | 4.69      | 0.172    | 6.84                                                      | 2.855 16.38 | 1.60E-05  | 4.80      |  |
| rs72716319  | 130599332 | 0.033                | 0.121                                                     | 4.48 | 2.25 8.93  | 2.03E-05  | 4.69      | 0.155    | 5.76                                                      | 2.355 14.06 | 0.0001238 | 3.91      |  |
| rs72716328  | 130606932 | 0.029                | 0.121                                                     | 5.18 | 2.56 10.48 | 4.90E-06  | 5.31      | 0.155    | 6.73                                                      | 2.724 16.63 | 3.61E-05  | 4.44      |  |
| rs147958197 | 130631395 | 0.030                | 0.145                                                     | 5.45 | 2.78 10.68 | 7.75E-07  | 6.11      | 0.138    | 5.50                                                      | 2.177 13.89 | 0.0003122 | 3.51      |  |
| rs55705857  | 130645692 | 0.036                | 0.157                                                     | 5.48 | 2.87 10.46 | 2.616E-07 | 6.58      | 0.172    | 6.52                                                      | 2.739 15.54 | 2.27E-05  | 4.64      |  |

  

| <b>Mayo and UCSF</b> |           |                      | <b>IDH1/2 Positive Oligodendrogliomas and MOAs (N=169)</b> |      |           |          |           |          | <b>IDH1/2 Negative Oligodendrogliomas and MOAs (N=30)</b> |            |           |           |  |
|----------------------|-----------|----------------------|------------------------------------------------------------|------|-----------|----------|-----------|----------|-----------------------------------------------------------|------------|-----------|-----------|--|
| SNP                  | BP        | Control MAF (N=1301) | Case MAF                                                   | OR   | 95% CI    | p        | -log10(p) | Case MAF | OR                                                        | 95% CI     | p         | -log10(p) |  |
| rs72714236           | 130468065 | 0.049                | 0.136                                                      | 3.18 | 2.13 4.74 | 1.42E-08 | 7.85      | 0.167    | 3.62                                                      | 1.64 7.96  | 0.00141   | 2.85      |  |
| rs72714295           | 130569398 | 0.061                | 0.157                                                      | 2.87 | 1.99 4.15 | 1.97E-08 | 7.71      | 0.217    | 4.42                                                      | 2.13 9.18  | 6.87E-05  | 4.16      |  |
| rs72714302           | 130588045 | 0.043                | 0.142                                                      | 3.78 | 2.53 5.64 | 8.65E-11 | 10.06     | 0.167    | 6.21                                                      | 2.63 14.63 | 3.01E-05  | 4.52      |  |
| rs72716319           | 130599332 | 0.043                | 0.142                                                      | 3.69 | 2.47 5.51 | 1.64E-10 | 9.78      | 0.150    | 5.23                                                      | 2.17 12.61 | 0.00022   | 3.66      |  |
| rs72716328           | 130606932 | 0.039                | 0.136                                                      | 3.89 | 2.58 5.86 | 7.63E-11 | 10.12     | 0.150    | 6.09                                                      | 2.51 14.81 | 6.62E-05  | 4.18      |  |
| rs147958197          | 130631395 | 0.037                | 0.151                                                      | 4.58 | 3.05 6.86 | 1.86E-13 | 12.73     | 0.133    | 5.11                                                      | 2.04 12.81 | 0.0004941 | 3.31      |  |
| rs55705857           | 130645692 | 0.046                | 0.181                                                      | 4.48 | 3.08 6.52 | 5.27E-15 | 14.28     | 0.167    | 5.95                                                      | 2.53 13.95 | 4.22E-05  | 4.37      |  |

\* Gold highlighted cells are significant after Bonferroni correction ( $p < 0.00030$ ); Yellow highlighted cells are nominally significant ( $p < 0.05$ )

\*\* INF=infinity

**Supplementary Table 5: Association of rs55705857 with the development of all gliomas and gliomas of oligodendroglial lineage when adjusted for six other low frequency SNPs and the two previously reported tag SNPs.**

| SNP                                | Indicated SNP adjusted for<br>rs55705857 |           |          | rs55705857 adjusted for<br>indicated SNP |            |          |
|------------------------------------|------------------------------------------|-----------|----------|------------------------------------------|------------|----------|
|                                    | OR                                       | 95% CI    | P-value* | OR                                       | 95% CI     | P-value* |
| <b>All Gliomas</b>                 |                                          |           |          |                                          |            |          |
| rs72714236                         | 1                                        | 0.73-1.35 | 0.97     | 3.11                                     | 2.31-4.2   | 1.00E-13 |
| rs72714295                         | 1.06                                     | 0.79-1.41 | 0.71     | 2.98                                     | 2.19-4.05  | 3.20E-12 |
| rs72714302                         | 0.97                                     | 0.63-1.49 | 0.89     | 3.17                                     | 2.11-4.77  | 2.90E-08 |
| rs72716319                         | 0.92                                     | 0.59-1.43 | 0.71     | 3.32                                     | 2.19-5.04  | 1.70E-08 |
| rs72716328                         | 0.97                                     | 0.61-1.53 | 0.88     | 3.20                                     | 2.09-4.89  | 8.20E-08 |
| rs14795819                         | 0.92                                     | 0.56-1.49 | 0.72     | 3.34                                     | 2.15-5.18  | 8.60E-08 |
| rs4295627                          | 0.98                                     | 0.83-1.15 | 0.76     | 3.17                                     | 2.47-4.08  | 2.40E-19 |
| rs891835                           | 1.07                                     | 0.94-1.23 | 0.31     | 2.96                                     | 2.35-3.73  | 5.50E-20 |
| <b>Oligodendrogliomas and MOAs</b> |                                          |           |          |                                          |            |          |
| rs72714236                         | 0.95                                     | 0.63-1.45 | 0.81     | 5.29                                     | 3.55-7.90  | 3.70E-16 |
| rs72714295                         | 0.89                                     | 0.58-1.37 | 0.59     | 5.62                                     | 3.62-8.73  | 1.50E-14 |
| rs72714302                         | 0.89                                     | 0.50-1.58 | 0.69     | 5.61                                     | 3.27-9.63  | 4.10E-10 |
| rs72716319                         | 0.74                                     | 0.41-1.34 | 0.33     | 6.50                                     | 3.72-11.36 | 4.70E-11 |
| rs72716328                         | 0.67                                     | 0.36-1.23 | 0.19     | 7.03                                     | 4.03-12.28 | 7.00E-12 |
| rs14795819                         | 0.9                                      | 0.50-1.63 | 0.73     | 5.55                                     | 3.24-9.51  | 4.60E-10 |
| rs4295627                          | 1.08                                     | 0.84-1.39 | 0.55     | 4.81                                     | 3.43-6.76  | 1.20E-19 |
| rs891835                           | 1.03                                     | 0.83-1.27 | 0.81     | 5.01                                     | 3.7-6.8    | 3.80E-25 |

\*Logistic regression analysis including rs55705857 and select chromosome 8 SNPs. Age, gender, and study site were included as covariates.

Supplementary Figure 1A: Conservation of the sequenced and imputed 8q24/*CCDC26* region. Various tracks from the UCSC Genome Browser are shown. Each vertical line indicates one of the seven index SNPs reported in the paper.

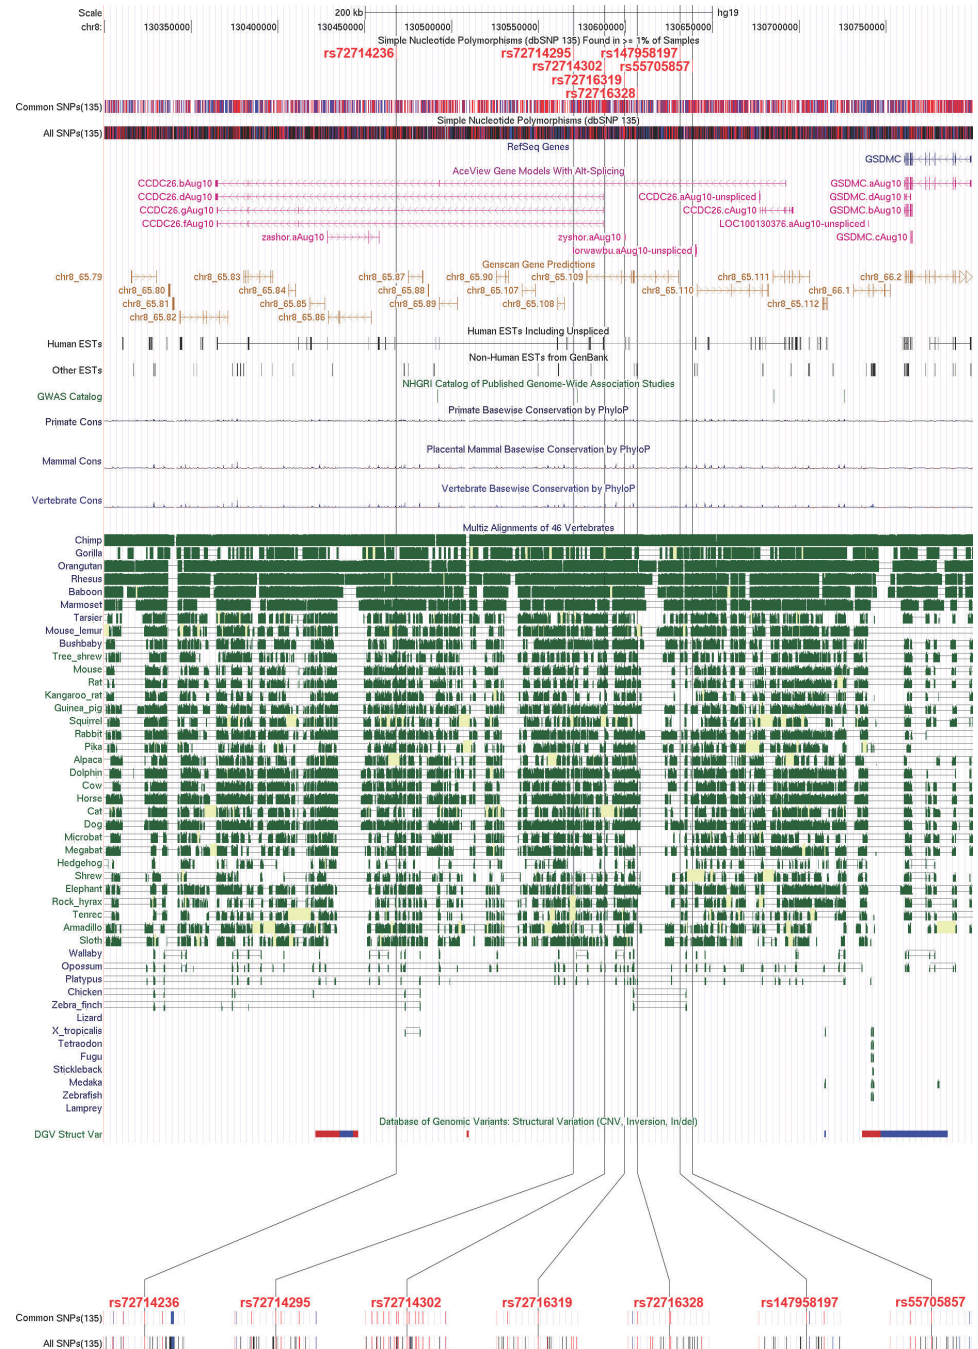

# Supplementary Figure 1B: Conservation of the 1001 bp region surrounding each of the seven index SNPs.

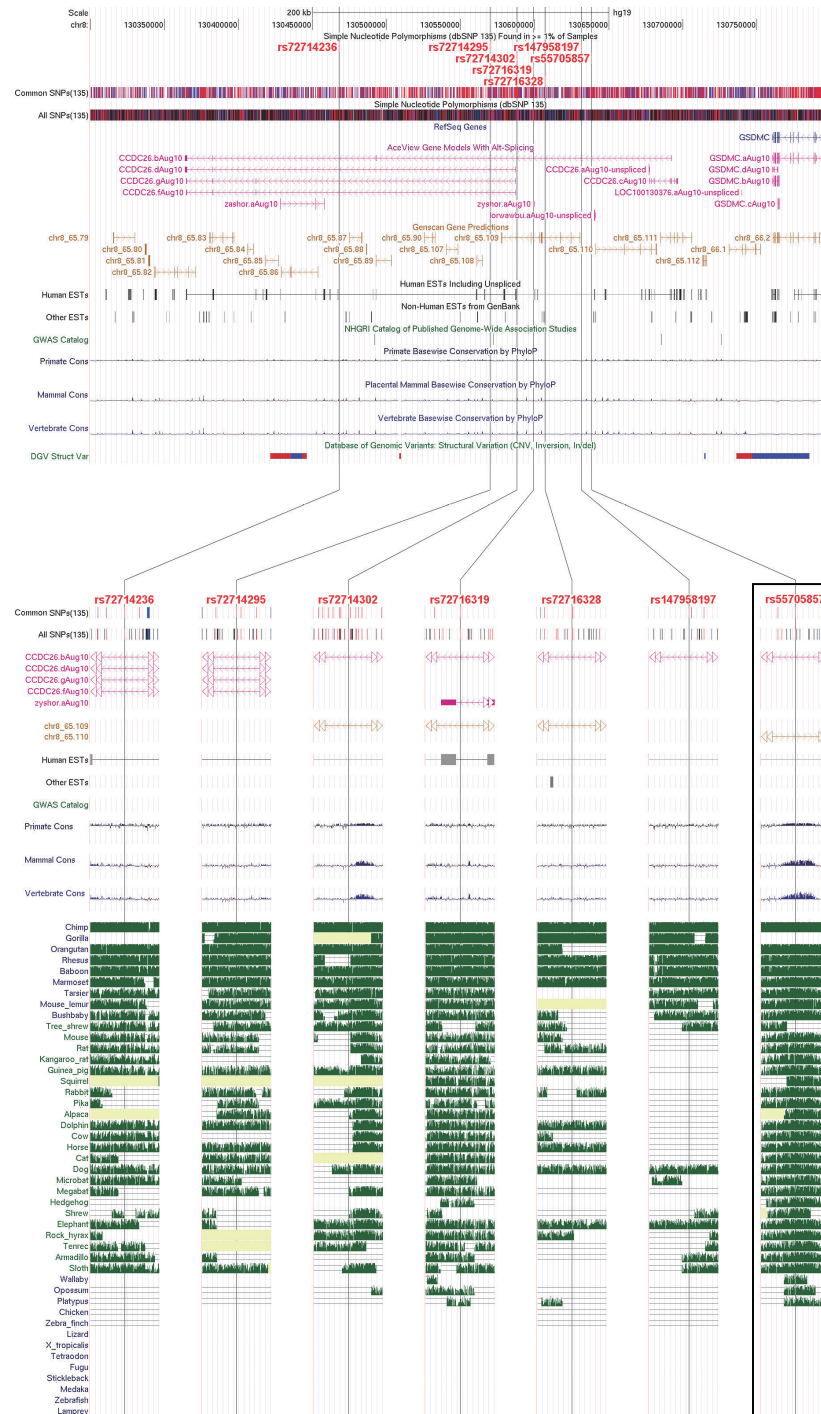



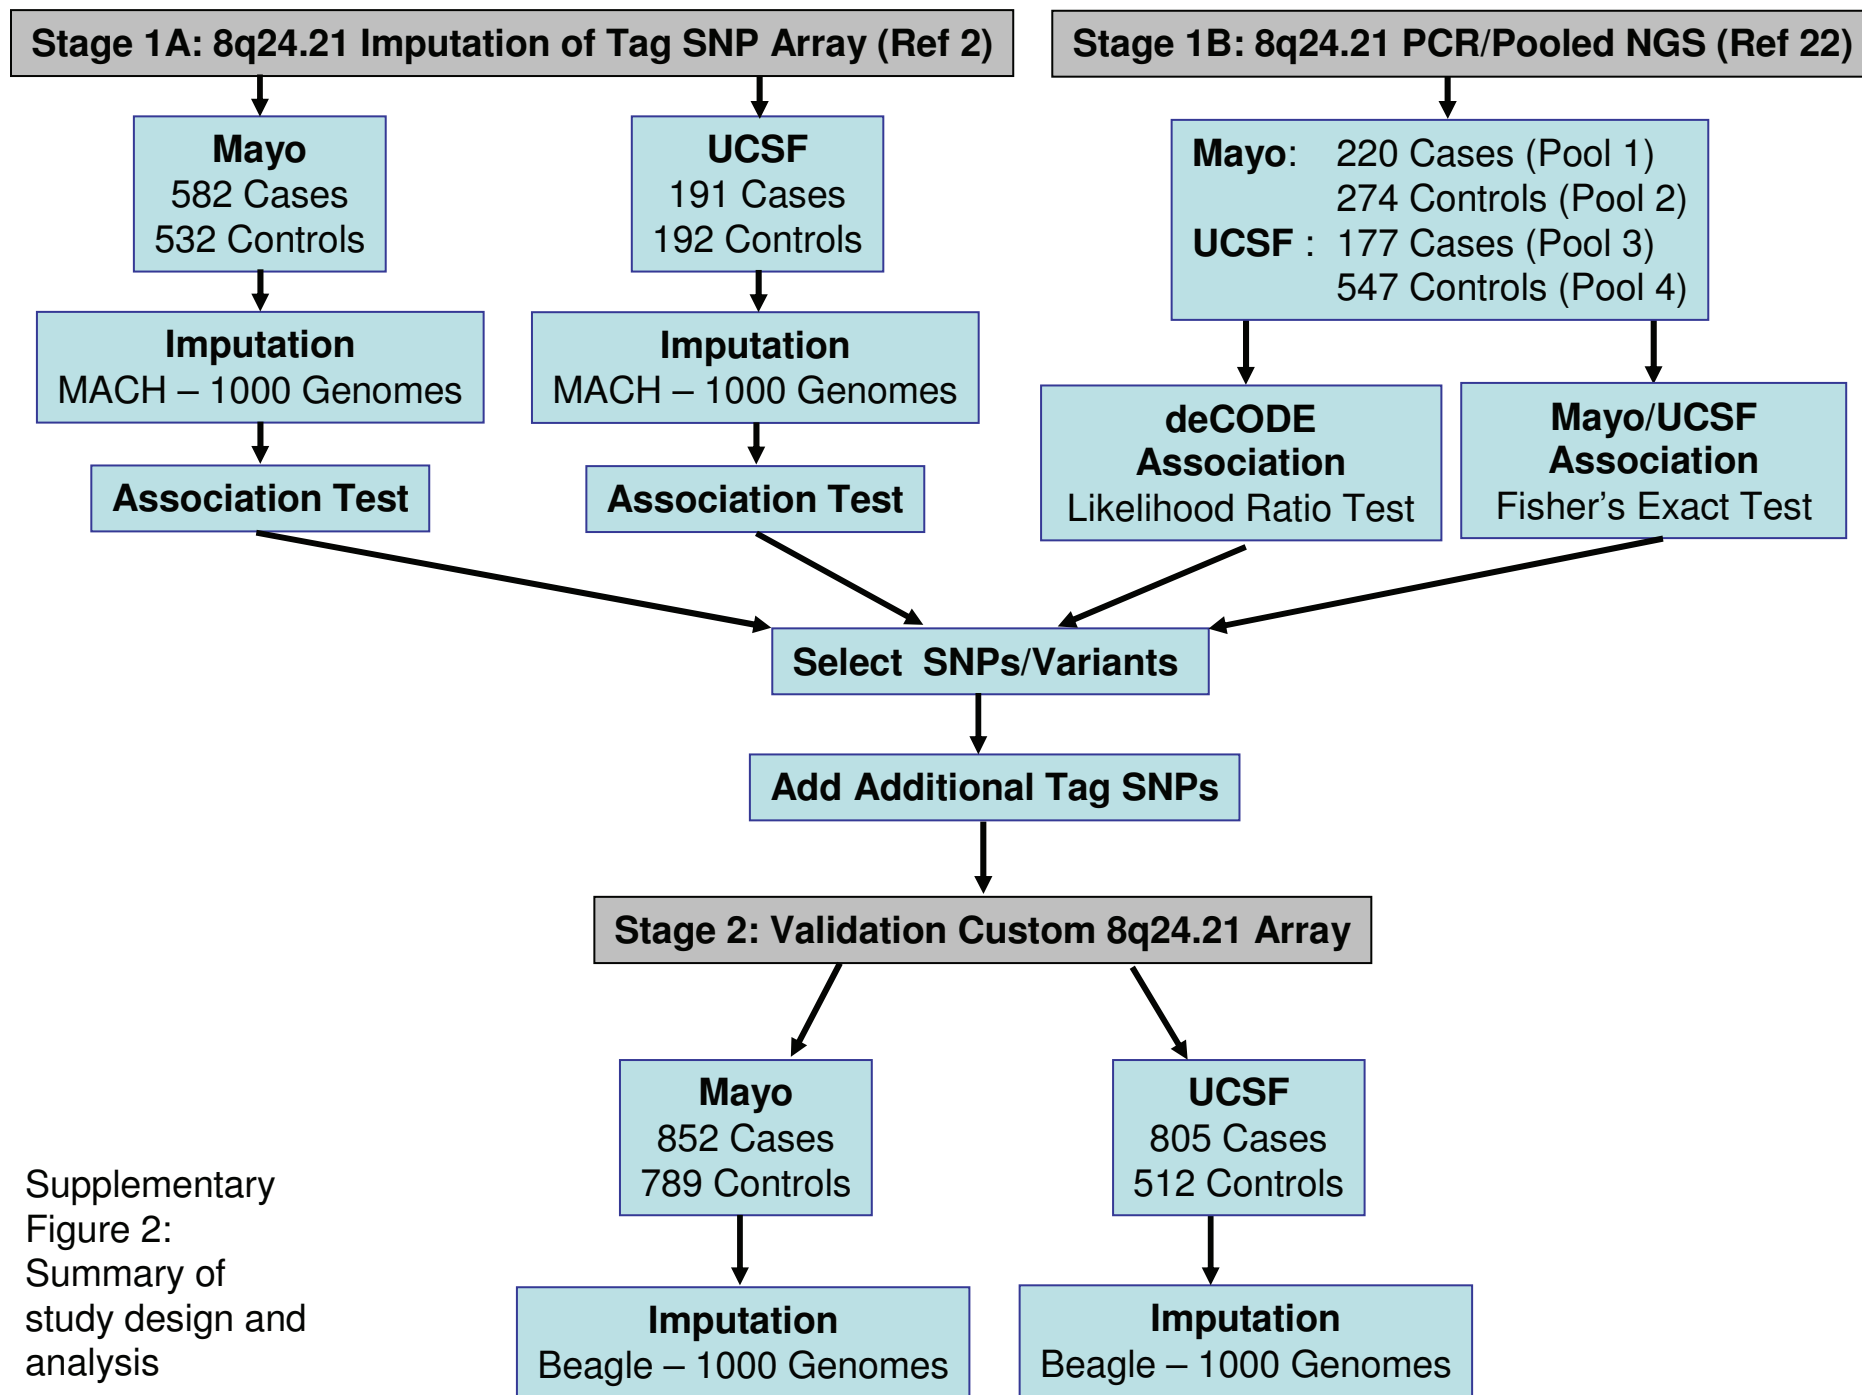

Supplementary  
Figure 2:  
Summary of  
study design and  
analysis

Supplementary Figure 3: Long-range PCR/pooled next-generation sequence coverage of the 8q24/*CCDC26* region (Stage 1B). Four coverage tracks are illustrated; one each for the 274 Mayo controls, the 547 UCSF controls, the 220 Mayo Clinic oligodendrogliomas and mixed oligoastrocytomas and the 177 UCSF oligodendrogliomas and mixed oligoastrocytomas. The Illumina Hap 550v3 track summarizes many of the variants in the region; the SNPs reported in previous publications are highlighted in black. AceView Gene Models and Genscan Gene predictions are also shown.

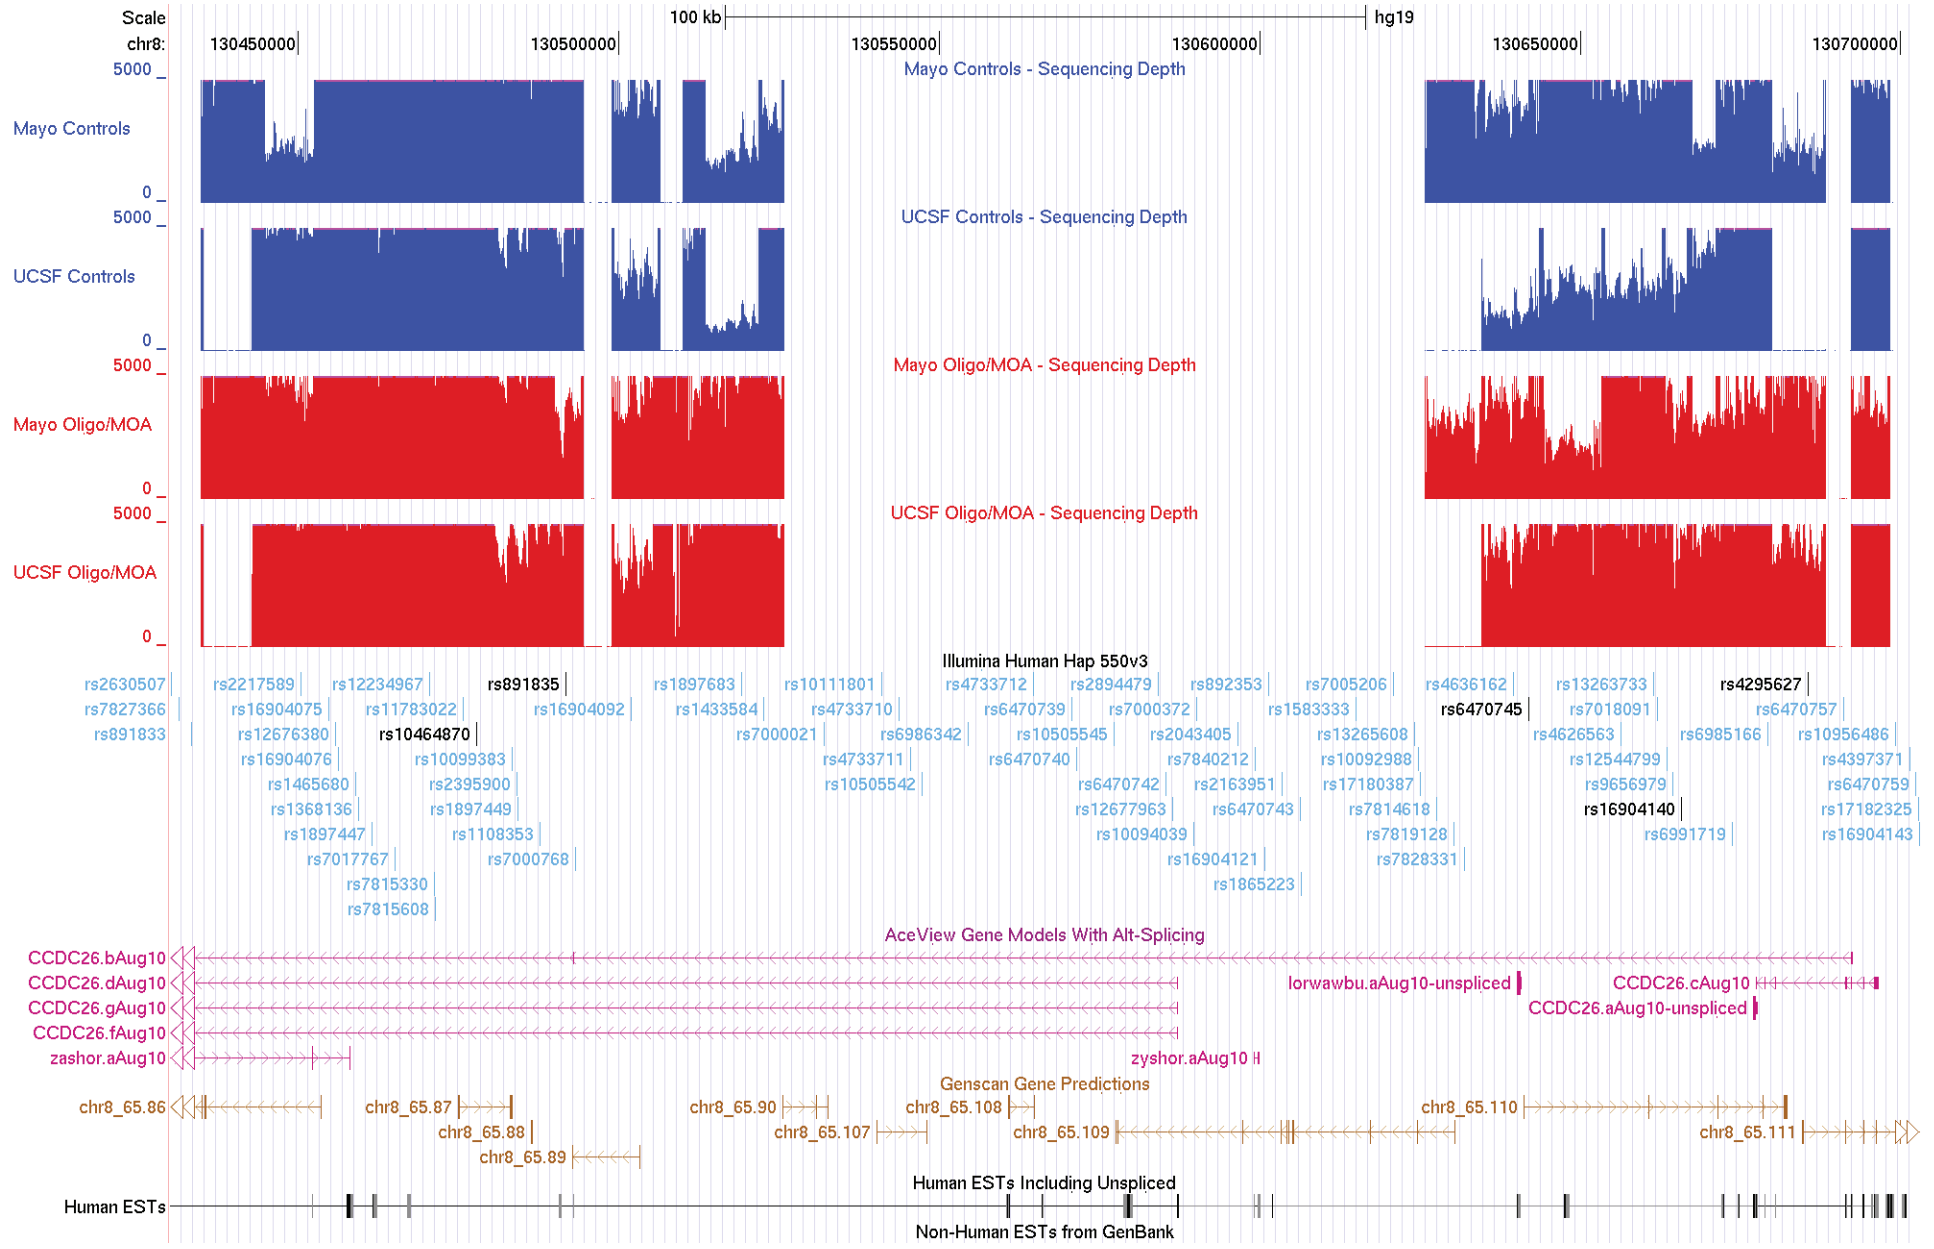

Supplementary Figure 4: Quality control of the pooled next-generation sequencing data from Stage 1B of the study design. The minor allele frequencies (MAFs) of known common variants for which there was prior tag genotyping data from similar groups of Mayo Clinic and UCSF cases and controls (Stage 1A)(reference 2) and the MAFs for the same SNPs as estimated by the pooled sequencing approach. The pooled next-generation sequencing approach accurately estimated the MAF for most common variants.

Control MAF Comparison

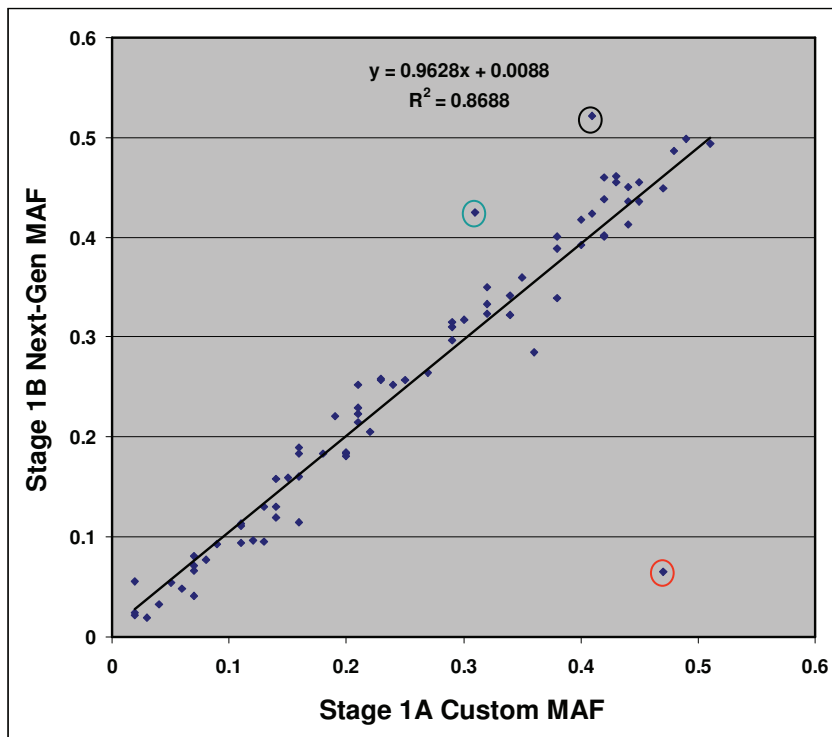

Case MAF Comparison

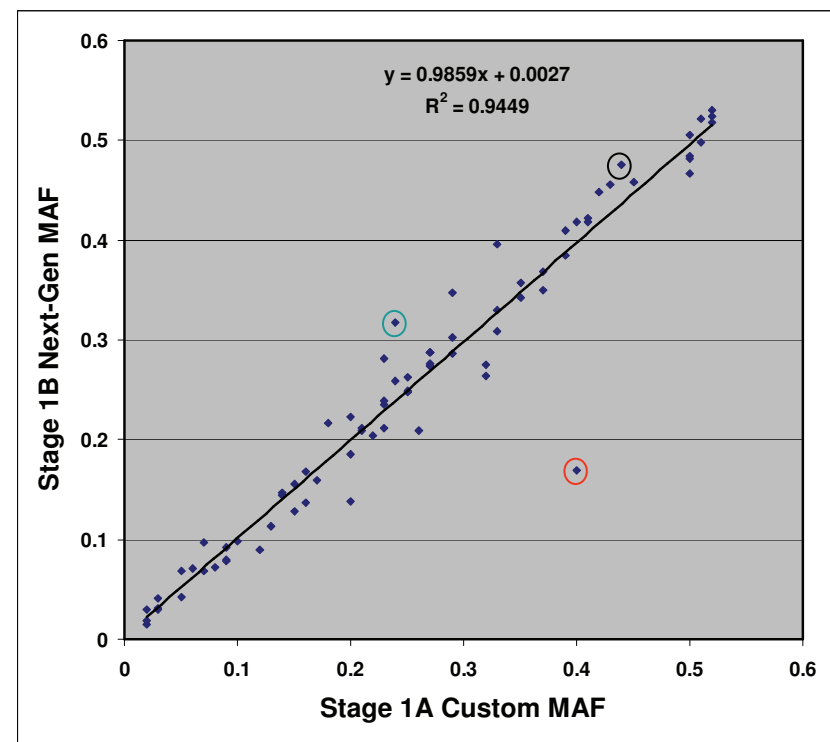



Supplementary Figure 5: 8q24/*CCDC26* SNPs identified by pooled NGS (Stage 1B) and by imputation (Stage 1A). The results of two independent bioinformatic analyses of the pooled sequencing data are shown. Imputation of the UCSF and the Mayo association data from the prior 8q24 tag custom array (reference 2) is also illustrated. ORs greater than 1.0 and the reciprocal of ORs less than 1.0 are plotted (the Effect Size). Results for the same variant are connected by dotted or dashed lines. The 7 SNPs reported in this paper are indicated by the numbered symbols. Only SNPs with case-control  $p < 0.01$  are illustrated. The bottom track summarizes the coverage of the long-range PCR/pooled sequencing.

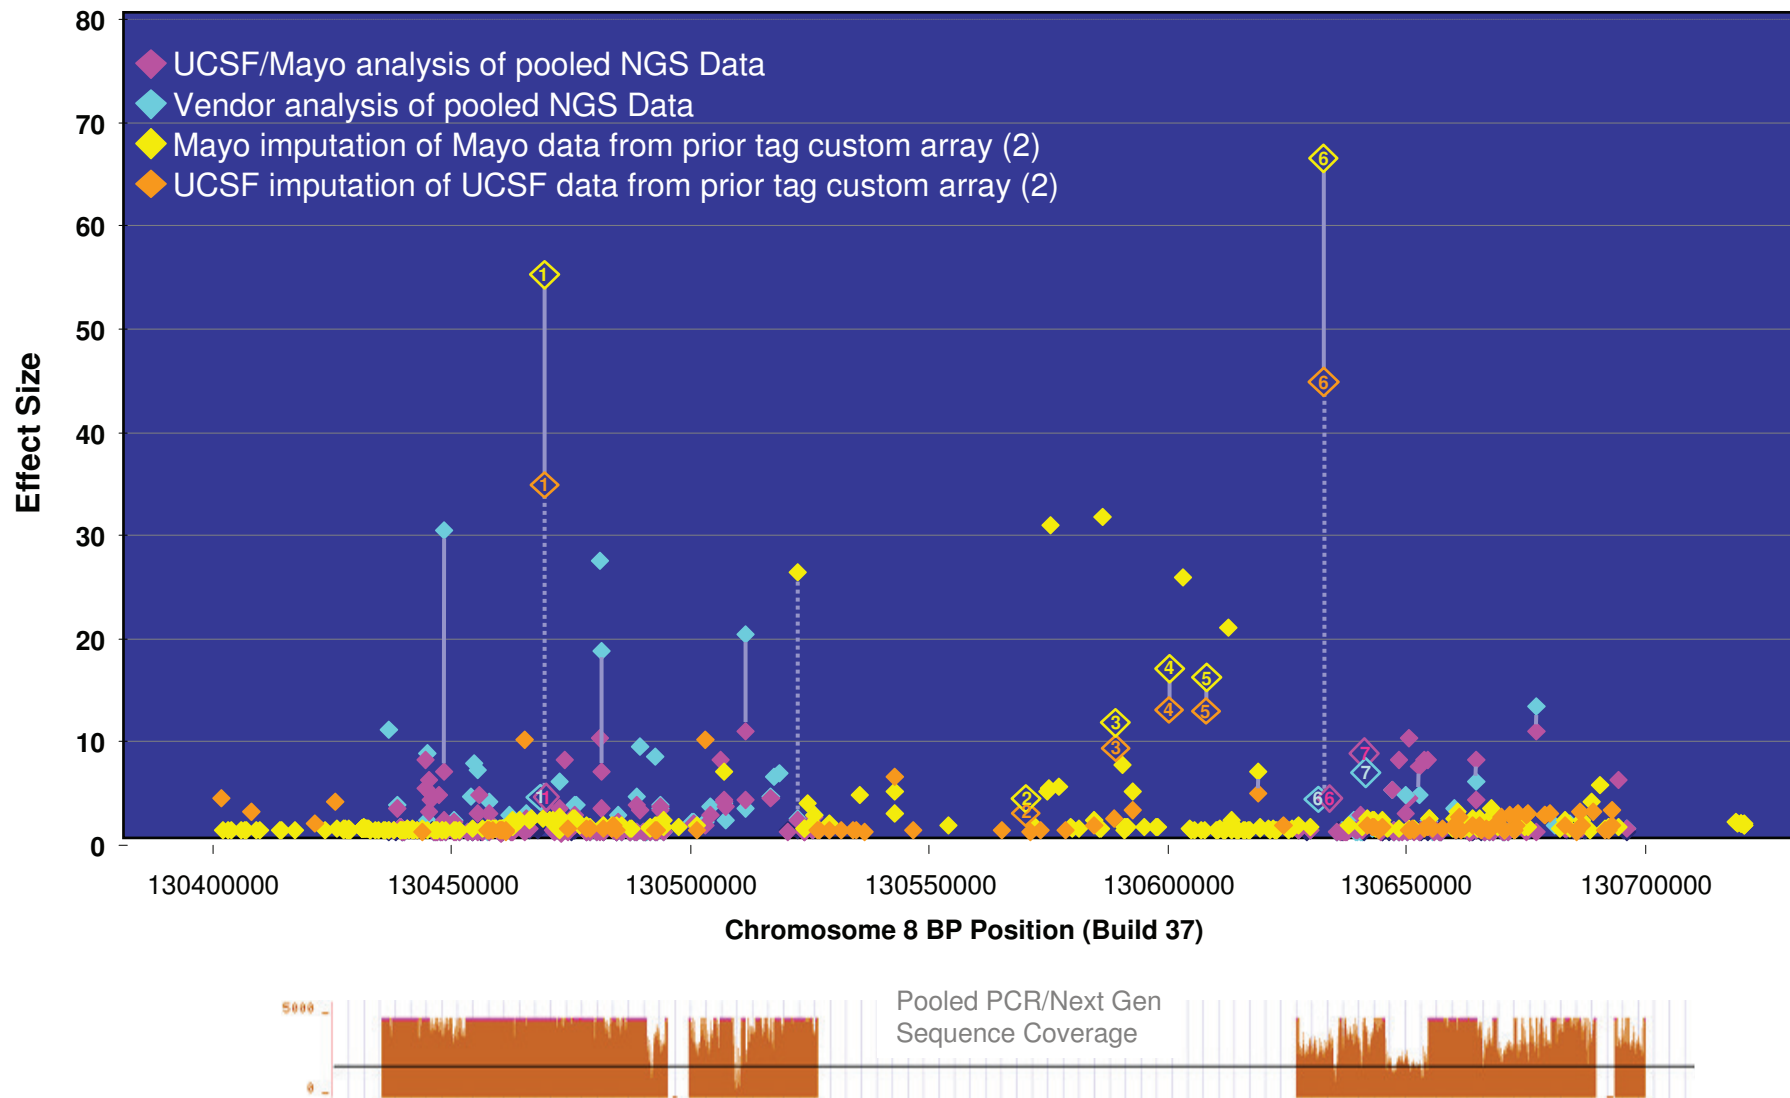

Supplement: NIHMS445706-supplement-Supplementary_Material.pdf [file NIHMS445706-supplement-Supplementary_Material.pdf]
